# Supplementary material for: Nanobiosensor for Detection and Quantification of DNA Sequences in Degraded Mixed Meats
Source: Hindawi journal article supplement (doi:10.1155/2011/781098), 2011-01-01
Supplement: f1 [file 781098.f1.pdf]

## Supplementary Materials

# Nanobiosensor for detection and quantification of swine DNA in degraded mixed meats

M. E. Ali<sup>1</sup>, U. Hashim<sup>1\*</sup>, S. Mustafa<sup>2</sup>, Y. B. Che Man<sup>2</sup>, M. H. M. Yusop<sup>2</sup>, M. Kashif<sup>1</sup>, Th. S. Dhahi<sup>1</sup>, M. F. Bari<sup>3</sup>, M. A. Hakim<sup>4</sup>  
and M. A. Latif<sup>5</sup>

<sup>1</sup>Institute of Nano Electronic Engineering (INNE), Universiti Malaysia Perlis, 01000 Kangar, Perlis, Malaysia

<sup>2</sup>Halal Products Research Institute, Universiti Putra Malaysia, 43400 UPM Serdang, Selangor, Malaysia

<sup>3</sup>School of Materials Engineering, Universiti Malaysia Perlis, 01000 Kangar, Perlis, Malaysia

<sup>4</sup>Institute of Tropical Agriculture, Universiti Putra Malaysia, 43400 UPM Serdang, Selangor, Malaysia

<sup>5</sup>Department of Crop Science, Faculty of Agriculture, Universiti Putra Malaysia, 43400 UPM Serdang, Selangor, Malaysia

\*Corresponding author: U. Hashim; E-mail: [uda@unimap.edu.my](mailto:uda@unimap.edu.my)

**Table S-1:** Data used in the generation of standard curve (figure 6 (a)) with synthetic oligo target (27 nt)

| FI-1         | FI-2         | FI-3         | ± SD               | Used TDNA (pmol/ml) | Av. FI             | TDNA Copy N./ml | P/T           |
|--------------|--------------|--------------|--------------------|---------------------|--------------------|-----------------|---------------|
| 0.09         | 0.13         | 0.2          | 0.055677644        | 0                   | 0.14               | 0               |               |
| <b>0.38</b>  | <b>0.5</b>   | <b>0.65</b>  | <b>0.135277493</b> | <b>0.00366</b>      | <b>0.51</b>        | <b>2.20E+09</b> | <b>4096:1</b> |
| <b>0.35</b>  | <b>0.55</b>  | <b>0.71</b>  | <b>0.18036999</b>  | <b>0.007324</b>     | <b>0.536666667</b> | <b>4.40E+09</b> | <b>2048:1</b> |
| <b>0.49</b>  | <b>0.72</b>  | <b>0.85</b>  | <b>0.182300119</b> | <b>0.01465</b>      | <b>0.686666667</b> | <b>8.80E+09</b> | <b>1024:1</b> |
| <b>0.76</b>  | <b>0.95</b>  | <b>1.08</b>  | <b>0.160934769</b> | <b>0.0293</b>       | <b>0.93</b>        | <b>1.76E+10</b> | <b>512:1</b>  |
| <b>0.89</b>  | <b>1.29</b>  | <b>1.31</b>  | <b>0.236924742</b> | <b>0.0586</b>       | <b>1.163333333</b> | <b>3.52E+10</b> | <b>256:1</b>  |
| <b>1.04</b>  | <b>1.66</b>  | <b>1.85</b>  | <b>0.423595719</b> | <b>0.1172</b>       | <b>1.516666667</b> | <b>7.04E+10</b> | <b>128:1</b>  |
| <b>1.28</b>  | <b>2.13</b>  | <b>2.25</b>  | <b>0.528803681</b> | <b>0.234375</b>     | <b>1.886666667</b> | <b>1.41E+11</b> | <b>64:1</b>   |
| <b>1.51</b>  | <b>2.69</b>  | <b>2.53</b>  | <b>0.640104158</b> | <b>0.46875</b>      | <b>2.243333333</b> | <b>2.82E+11</b> | <b>32:1</b>   |
| <b>2.16</b>  | <b>3.33</b>  | <b>3.28</b>  | <b>0.661538611</b> | <b>0.9375</b>       | <b>2.923333333</b> | <b>5.63E+11</b> | <b>16:1</b>   |
| <b>3.23</b>  | <b>3.95</b>  | <b>4.73</b>  | <b>0.750199973</b> | <b>1.875</b>        | <b>3.97</b>        | <b>1.13E+12</b> | <b>8:1</b>    |
| 4.33         | 5.73         | 6.02         | 0.903714557        | 2.8125              | 5.36               | 1.68E+12        | 6:1           |
| <b>6.01</b>  | <b>7.62</b>  | <b>7.77</b>  | <b>0.975721955</b> | <b>3.75</b>         | <b>7.133333333</b> | <b>2.25E+12</b> | <b>4:1</b>    |
| 8.44         | 9.91         | 10.26        | 0.965729431        | 5.6                 | 9.536666667        | 3.38E+12        | 3:1           |
| <b>11.47</b> | <b>12.7</b>  | <b>13.56</b> | <b>1.05044435</b>  | <b>7.5</b>          | <b>12.57666667</b> | <b>4.50E+12</b> | <b>2:1</b>    |
| 14.84        | 16.33        | 17.32        | 1.248372274        | 11.25               | 16.16333333        | 6.75E+12        | 3:2           |
| <b>18.98</b> | <b>20.06</b> | <b>22.33</b> | <b>1.709863542</b> | <b>15</b>           | <b>20.45666667</b> | <b>9.01E+12</b> | <b>1:1</b>    |
| 23.14        | 24.44        | 26.44        | 1.662327685        | 22.5                | 24.67333333        | 1.35E+13        | 2:3           |
| <b>27.66</b> | <b>28.88</b> | <b>30.38</b> | <b>1.362399843</b> | <b>30</b>           | <b>28.97333333</b> | <b>1.80E+13</b> | <b>1:2</b>    |
| 32.45        | 33.68        | 35.59        | 1.582224173        | 45                  | 33.90666667        | 2.70E+13        | 1:3           |
| <b>37.88</b> | <b>39.25</b> | <b>41.22</b> | <b>1.67895801</b>  | <b>60</b>           | <b>39.45</b>       | <b>3.60E+13</b> | <b>1:4</b>    |
| 40.05        | 41.09        | 41.98        | 0.965971014        | 90                  | 41.04              | 5.40E+13        | 1:6           |
| <b>40.99</b> | <b>41.73</b> | <b>42.54</b> | <b>0.775263396</b> | <b>120</b>          | <b>41.75333333</b> | <b>7.20E+13</b> | <b>1:8</b>    |

FI-1, 2, 3: Fluorescence intensity of triplicates; SD: standard deviation of triplicates; TDNA: Synthetic target DNA; Av. FI:

Average fluorescence intensity of the triplicates, TDNA Copy N.: target DNA copy number and P/T: Probe/target ratio.

**Table S-2:** Data used in the generation of standard curve (figure 6 (b)) with *AluI* digested swine DNA extracted from raw pork.

| FI-1  | FI-2  | FI-3  | ± SD        | <sup>a</sup> TDNA (µg/ml) | Av. FI      | Copy N./ml | P/T     | <sup>c</sup> Relative accuracy (%) | Ref. FI (table S-1) |
|-------|-------|-------|-------------|---------------------------|-------------|------------|---------|------------------------------------|---------------------|
| 0.45  | 0.53  | 0.62  | 0.085049005 | 0                         | 0.533333333 |            |         |                                    |                     |
| 0.42  | 0.57  | 0.78  | 0.180831413 | 0.0585937                 | 0.59        | 4.76E+09   | 1907:1  | 14.23                              | 0.54                |
| 0.52  | 0.74  | 0.84  | 0.163707055 | 0.1171875                 | 0.7         | 8.92E+09   | 1010:1  | 1300%                              | 0.68                |
| 0.97  | 1.3   | 1.45  | 0.245560583 | 0.234375                  | 1.24        | 5.78E+10   | 155.9:1 | 43.64                              | 1.51                |
| 1.39  | 1.67  | 1.96  | 0.28501462  | 0.46875                   | 1.673333333 | 1.25E+11   | 72:1    | 46.64                              | 1.88                |
| 1.78  | 2.48  | 2.51  | 0.413077878 | 0.9375                    | 2.256666667 | 2.80E+11   | 32.2:1  | 52.31                              | 2.24                |
| 2.56  | 3.02  | 3.59  | 0.515978036 | 1.875                     | 3.056666667 | 8.60E+11   | 10.3:1  | 87.64                              | 3.97                |
| 4.02  | 4.3   | 5.19  | 0.610928255 | 2.81                      | 4.503333333 | 1.40E+12   | 7.16:1  | 87.2                               | 5.36                |
| 5.67  | 6.76  | 6.93  | 0.683690963 | 3.75                      | 6.453333333 | 2.04E+12   | 4.41:1  | 95.22                              | 7.13                |
| 7.88  | 8.56  | 9.53  | 0.829236597 | 5                         | 8.656666667 | 3.05E+12   | 3.32:1  | 94.9                               | 9.53                |
| 10.77 | 11.48 | 12.68 | 0.965418735 | 7.5                       | 11.64333333 | 4.16E+12   | 2.16:1  | 97.08                              | 12.58               |
| 14.03 | 14.99 | 16.27 | 1.123803067 | 11.25                     | 15.09666667 | 6.29E+12   | 3.2:2   | 97.83                              | 16.16               |
| 18.49 | 19.56 | 20.54 | 1.025329215 | <sup>b</sup> 15           | 19.53       | 8.57E+12   | 1.05:1  | 100                                | 20.46               |
| 23.18 | 23.35 | 25.32 | 1.189495691 | 22.5                      | 23.95       | 1.31E+13   | 2:2.9   | 98.1                               | 24.67               |
| 27.55 | 28.45 | 29.88 | 1.175003546 | 30                        | 28.62666667 | 1.78E+13   | 1:2     | 96.15                              | 28.97               |
| 32.12 | 33.78 | 34.08 | 1.055714608 | 45                        | 33.32666667 | 2.65E+13   | 1:3     | 96.93                              | 33.9                |
| 37.68 | 37.92 | 39.72 | 1.114988789 | 60                        | 38.44       | 3.50E+13   | 1:3.9   | 97.9                               | 39.45               |
| 39.87 | 40.55 | 40.95 | 0.546015873 | 90                        | 40.45666667 | 5.31E+13   | 1:5.9   | 96.74                              | 41.04               |
| 40.55 | 41.19 | 41.33 | 0.415852538 | 120                       | 41.02333333 | 5.39E+13   | 1:6     | 78.58                              | 41.04               |

<sup>a</sup>*AluI* digested swine DNA extracted from raw pork; <sup>b</sup>Taken as internal standard to calculate relative accuracy.

#### <sup>c</sup>S-2: Calculation of relative accuracy

As copy number of mitochondrial DNA varies significantly from species to species and even within the species [47], we could not calculate absolute copy number. We found in triplicate experiments that 15 µg/ml *AluI*-cut genomic DNA produced 19.53 units of fluorescence on an average. It was close to 15 nM synthetic target which produced fluorescence of 20.46 units (table S-1) in triplicate experiments. We used the formula,  $C_2 = C_1 I_2 / I_1$ , described in section 3.1 to quantify targets and found 15 µg/ml *AluI*-cut genomic DNA contained  $8.57 \times 10^{12}$  copies of cytb gene. We took it as 100% accurate. Using the same quantification formula, we calculated the copy number of targets in each preparation using closely matched fluorescence in table S-1 as a reference. We compared it with the known values and expressed it as relative accuracy in percentage. For example, 7.5 µg/ml *AluI*-cut genomic DNA should contain  $4.285 \times 10^{12}$  copies of cytb. However, experimentally determined value using 12.58 in table S-1 as reference fluorescence was  $4.16 \times 10^{12}$ . Thus the calculated relative accuracy was  $4.16/4.285 \times 100 = 97.08\%$ .

**Table S-3:** Quantification of swine DNA from *AluI* digested mixed DNAs extracted from raw pork-beef mixture.

| Pork (%) | FI-1  | FI-2  | FI-3  | ± SD        | <sup>a</sup> Calc. TDNA in µg/ml | <sup>b</sup> Estd. in µg/ml | Av. FI      | T. Copy N./ml | P/T     | <sup>c</sup> Rel. Accuracy (%) | Ref. FI (table S-2) |
|----------|-------|-------|-------|-------------|----------------------------------|-----------------------------|-------------|---------------|---------|--------------------------------|---------------------|
| 0        | 0.27  | 0.42  | 0.5   | 0.116761866 | 0                                | 0                           | 0.396666667 |               |         |                                |                     |
| 0        | 0.45  | 0.5   | 0.63  | 0.092915732 |                                  | 0                           | 0.526666667 |               |         |                                |                     |
| 0.1      | 0.48  | 0.62  | 0.72  | 0.120554275 | 0.06                             | 0.055                       | 0.606666667 | 4.50E+10      | 1998:1  | 92.5                           | 0.59                |
| 0.5      | 1.15  | 1.32  | 1.44  | 0.14571662  | 0.3                              | 0.25                        | 1.303333333 | 6.10E+10      | 147.7:1 | 82.5                           | 1.24                |
| 1        | 1.66  | 1.98  | 2.15  | 0.248797106 | 0.6                              | 0.54                        | 1.93        | 1.44E+11      | 62.57:1 | 90                             | 1.67                |
| 5        | 3.89  | 4.28  | 4.89  | 0.504017195 | 3                                | 2.72                        | 4.353333333 | 1.35E+12      | 6.67:1  | 90.75                          | 4.5                 |
| 10       | 8.35  | 8.74  | 9.68  | 0.683690963 | 6                                | 5.82                        | 8.923333333 | 3.15E+12      | 2.86:1  | 97                             | 8.65                |
| 25       | 17.75 | 18.47 | 19.63 | 0.948542742 | <sup>d</sup> 15                  | 14.33                       | 18.61666667 | 8.19E+12      | 1.1:1   | 95.53                          | 19.53               |
| 50       | 26.56 | 27.46 | 28.66 | 1.053565375 | 30                               | 29                          | 27.56       | 1.72E+13      | 1:1.9   | 96.65                          | 28.62               |
| 100      | 35.86 | 36.89 | 38.08 | 1.110960545 | 60                               | 57.63                       | 36.94333333 | 3.36E+13      | 1:3.7   | 96.05                          | 38.44               |

<sup>a</sup>DNA calculated from the assumption that 100% pork contained 60 µg/ml swine DNA; <sup>b</sup>Estimated swine DNA calculated from closely matched reference fluorescence (Ref. FI in table S-2) from standard curve using experimental fluorescence (Av. FI); <sup>c</sup>Internal standard used in calculating relative accuracy.

#### <sup>c</sup>S-3: Calculation of relative accuracy

In this calculation closely matched fluorescence in table S-2 was taken as a reference and 15 µg/ml *AluI*-cut swine DNA was taken as internal control. We used the formula,  $C_2 = C_1 I_2 / I_1$ , described in section 3.1 as quantification formula and 14.33 µg/ml DNA was found in place of 15 µg/ml. Thus the calculated relative accuracy was  $14.33/15 \times 100 = 95.53\%$ .

**Table S-4:** Quantification of swine DNA from *AluI* digested mixed DNAs extracted from autoclaved pork-beef mixture.

| Pork (%) | FI-1  | FI-2  | FI-3  | ± SD       | Estd. TDNA (µg/ml) | Av. FI      | TDNA Copy N./ml | P/T    | Relative Accuracy (%) | Ref. FI (table S-2) |
|----------|-------|-------|-------|------------|--------------------|-------------|-----------------|--------|-----------------------|---------------------|
| 0        | 0.11  | 0.16  | 0.22  | 0.05507570 | 0                  | 0.163333333 | 0               |        |                       |                     |
| 0        | 0.13  | 0.18  | 0.26  | 0.06557438 |                    | 0.19        | 0               |        |                       |                     |
| 0.1      | 0.44  | 0.52  | 0.68  | 0.12220201 | 0.055              | 0.54666666  | 4.50E+10        | 2002:1 | 77.39                 | 0.59                |
| 0.5      | 0.58  | 0.79  | 0.93  | 0.17616280 | 0.129              | 0.76666666  | 9.80E+10        | 919:1  | 96.6                  | 0.7                 |
| 1        | 1.26  | 1.49  | 1.74  | 0.24006943 | 0.42               | 1.49666666  | 1.12E+11        | 80.4:1 | 42.69                 | 1.67                |
| 5        | 2.13  | 2.69  | 2.94  | 0.41476901 | 1.08               | 2.58666666  | 3.23E+11        | 27.9:1 | 80.89                 | 3.05                |
| 10       | 3.03  | 3.68  | 4.05  | 0.51636550 | 2.205              | 3.58666666  | 1.09E+12        | 8.26:1 | 83.7                  | 3.05                |
| 25       | 8.77  | 9.16  | 9.92  | 0.58483615 | 5.99               | 9.28333333  | 3.25E+12        | 2.77:1 | 89.66                 | 8.66                |
| 50       | 14.78 | 15.84 | 16.96 | 1.09013760 | 11.8275            | 15.86       | 6.61E+12        | 1.36:1 | 90                    | 15.1                |
| 100      | 24.03 | 25.44 | 26.68 | 1.32590849 | <sup>a</sup> 26.7  | 25.3833333  | 1.58E+13        | 1:1.8  | 100                   | 23.95               |

<sup>a</sup>Internal standard used for calculating relative accuracy.

#### <sup>a</sup>S-4: Calculation of relative accuracy

Prolong (2.5-h) autoclave cooking degraded many targets. Consequently, fluorescence was significantly reduced (figure 5). Table S-2 was used as a reference and it was estimated that 100% autoclaved pork contained 26.7 µg/ml *AluI*-cut swine DNA with  $1.58 \times 10^{13}$  copies of *cytb*. We considered it as 100% accurate. We used the formula,  $C_2 = C_1 I_2 / I_1$ , described in section 3.1 to quantify potential targets in each preparation and expressed as relative accuracy.

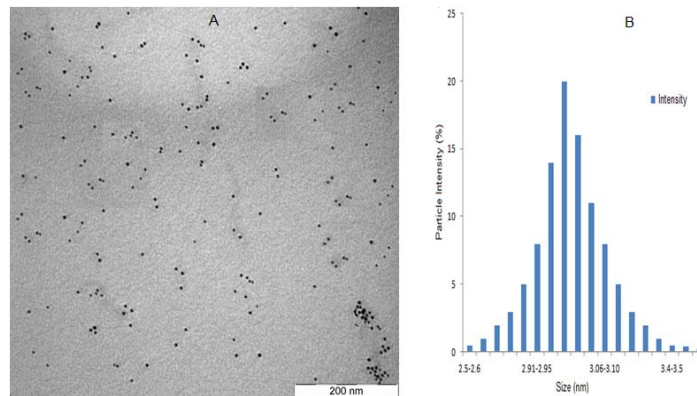

**Figure S-1:** TEM image of citrate-tannate coated gold nanoparticles (A) and size distribution chart (B) generated from the analysis of five hundred particles. The average diameter of the particles was found to  $3\pm 0.2$  nm.

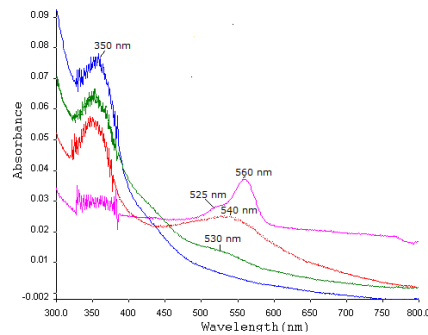

**Figure S-2:** UV-vis spectra of citrate-tannate-coated gold nanoparticles (10 nM) and TMR-labeled thiolated oligo-probe under various conditions. For illustration; thiolated oligo-TMR (15 nM) in water (pink curve), 10 nM GNPs incubated with 3-fold molar excess of thiolated oligo-TMR before purification (green curve) & after purification (red curve) and the supernatant (citrate-tannate) after removal of gold particles (blue curve). Please note the masked shoulder at 540 nm by citrate-tannate before purification.

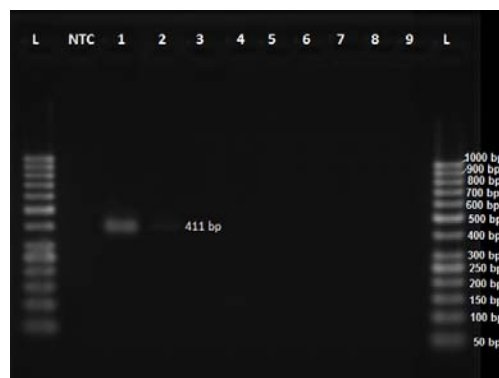

**Figure S-3:** Gel image of 411 bp swine PCR products amplified from swine DNA extracted from pure raw pork and 2.5-h autoclaved pork-beef mixtures. L: 50 bp ladder; NTC: negative template control; lane 1: pure raw pork; lanes 2-9: 100%, 50%, 25%, 10%, 5%, 1%, 0.5% and 0.1% pork in 2.5-h autoclaved pork-beef admixtures.
